1 **Mapping Serotonergic Dynamics using Drug-Modulated Molecular**  
2 **Connectivity**

3 Ionescu TM<sup>1</sup>, Amend M<sup>1</sup>, Hafiz R<sup>2</sup>, Maurer A<sup>1</sup>, Biswal BB<sup>2</sup>, Wehrl HF<sup>1†</sup>, Herfert K<sup>1 †</sup>

4 1 Werner Siemens Imaging Center, Department of Preclinical Imaging and Radiopharmacy,  
5 Eberhard Karls University Tuebingen, Germany

6 2 Department of Biomedical Engineering, New Jersey Institute of Technology, University  
7 Heights, Newark, New Jersey, USA

8 † contributed equally

9

10 Corresponding author:

11 Prof. Dr. Kristina Herfert ([kristina.herfert@med.uni-tuebingen.de](mailto:kristina.herfert@med.uni-tuebingen.de))

12 Address: Roentgenweg 13, 72076 Tuebingen, Germany,

13 Tel: +49 7071 29 87680

14

## 15 **Abstract**

16 Brain imaging plays a critical role in unraveling the complex functional architecture of  
17 animal and human brains. However, individual imaging modalities often face  
18 limitations confining them to narrow physiological perspectives. Our study introduces  
19 “Molecular connectivity” (MC), a novel concept in imaging that provides a detailed  
20 view of molecular interactions and their implications for brain functionality. This  
21 research bridges the gap between functional magnetic resonance imaging (fMRI)  
22 which tracks neurovascular dynamics, and positron emission tomography (PET),  
23 revealing molecular changes at the receptor level. The integration of these  
24 techniques can enhance our comprehension of brain-wide effects of drugs. In this  
25 study, we delve deeper into this integration by extracting molecular connectivity (MC)  
26 at the individual subject level using dynamic [<sup>11</sup>C]DASB PET scans, which map  
27 serotonin transporters (SERT). We particularly focus on assessing the ability of this  
28 method to track pharmacological alterations introduced by  
29 methylenedioxymethamphetamine (MDMA).

30 Our comprehensive analysis involves a comparison between MC and functional  
31 connectivity (FC), utilizing seed-based and independent component analysis (ICA)  
32 during resting states. We identified significant, physiologically pertinent independent  
33 components with the [<sup>11</sup>C]DASB data, thereby enhancing the interpretation of FC  
34 results. Remarkably, we observed pronounced changes in MC following a single  
35 MDMA administration with strong correlations between resting state MC and the  
36 spatial-temporal patterns of MDMA’s effect on SERT occupancy.

37 This research marks a pioneering effort in investigating subject-level MC using PET  
38 imaging. Our findings suggests that these advanced imaging techniques can  
39 substantially refine our understanding of how drugs influence the overarching  
40 functional organization of the brain.

41

## 42 **Introduction**

43 The field of neuroscience has witnessed remarkable advancements over the past  
44 decade, particularly propelled by the advent of innovative imaging techniques. The  
45 simultaneous application of positron emission tomography (PET) and magnetic  
46 resonance imaging (MRI) has revolutionized our ability to concurrently assess brain  
47 function across various physiological dimensions [1, 2]. This is especially true in the  
48 context of drug effect evaluations. The combination of PET with functional MRI (fMRI)  
49 has opened a plethora of investigative avenues. Techniques such as resting-state  
50 functional connectivity (rs-FC) [3] or pharmacological fMRI (phMRI) [4] are now  
51 complemented by the capability of PET to quantify molecular changes, including  
52 alterations in receptor and transporter availability [5].

53 While fMRI provides high spatial and temporal resolution, the interpretation of its  
54 readout necessitates caution. The Blood-Oxygen-Level-Dependent (BOLD) signal  
55 used in fMRI indirectly captures neuronal changes through neurovascular coupling  
56 [6]. This only reveals the hemodynamic consequences of molecular-level drug  
57 effects. The integration of simultaneous PET acquisition can bridge this interpretative  
58 gap by offering essential molecular insights, particularly regarding transporter or  
59 receptor alterations. Typically, PET, used either independently or simultaneously to  
60 fMRI, has been mainly used in pharmacological studies for illustrating quantitative  
61 shifts in neuroreceptor or transporter availabilities [7]. Several studies have also  
62 explored the interregional coherence of PET tracer signals [8-10], an approach akin  
63 to fMRI-derived rs-FC. While subject-wise metabolic connectivity using [<sup>18</sup>F]FDG-PET  
64 has been established through the temporal correlation of regional PET signals [1, 8],  
65 studies employing transporter or receptor tracers have predominantly focused on  
66 interregional binding coherences across subjects using static scans [9, 10]. The  
67 concept and feasibility of molecular connectivity (MC) through the temporal  
68 correlation of dynamic binding potentials of transporter or receptor tracers have yet to  
69 be explored.

70 In our study, we investigate the feasibility of deriving MC from dynamic [<sup>11</sup>C]DASB-  
71 PET scans acquired simultaneously with fMRI in rats. We divided the rats into two  
72 cohorts: a baseline group and a pharmacological application group, exposed to 3,4-  
73 methyldeoxymetamphetamine (MDMA). The baseline cohort served to assess the  
74 feasibility of the novel methodology, contrasting it with traditional fMRI-derived rs-FC

75 with a specific focus on temporal stability. We postulated that dynamic [ $^{11}\text{C}$ ]DASB  
76 PET temporal fluctuations could be harnessed for connectivity data, in a manner  
77 similar to hemodynamic rs-FC, using seed-based and independent component  
78 analysis (ICA).

79 The second cohort, subjected to an MDMA challenge allowed us to evaluate the  
80 utility of our novel approach. We aimed to outline the effects of MDMA by integrating  
81 the innovative MC concept with established analysis techniques. Our primary  
82 objective of this research was to elucidate the potential of PET-derived MC in  
83 conjunction with simultaneous PET/fMRI, exploring the avenues this methodology  
84 could open for future diagnostic and drug development studies.

## 85 **Material and Methods**

86 Our study reevaluates two distinct datasets previously published by our group [11,  
87 12], to simultaneously explore FC and MC both at baseline conditions [12] and  
88 following MDMA administration [11]. For detailed descriptions on animal handling,  
89 experimental setups, and data acquisition procedures, please refer to these earlier  
90 publications.

### 91 **Animals**

92 A total of 41 male Lewis rats were obtained from Charles River Laboratories  
93 (Sulzfeld, Germany). Thirty rats underwent baseline [ $^{11}\text{C}$ ]DASB PET/fMRI scans  
94 without any pharmacological intervention, while 11 rats underwent [ $^{11}\text{C}$ ]DASB  
95 PET/fMRI scans including an acute MDMA challenge. All experiments were  
96 conducted in compliance with German federal regulations for experimental animals  
97 and received approval from the Regierungspräsidium Tübingen.

### 98 **Simultaneous PET/fMRI Experiments**

99 The rats were subjected to simultaneous PET/fMRI experiments involving 1.3%  
100 isoflurane anesthesia, tail vein catheterization, positioning on a temperature-  
101 controlled bed, and monitoring vital signs. The scans were performed using a 7T  
102 small-animal ClinScan MRI scanner (Bruker Biospin, Ettlingen, Germany) with a  
103 custom-developed PET insert [13]. Both the scanning protocol and the sequence  
104 parameters have been outlined in detail in our previous publication [11]. The MDMA

105 cohort received a pharmacological MDMA challenge of 3.2 mg/kg intravenously 40  
106 minutes after tracer injection.

## 107 **Data Preprocessing and Analysis**

108 Data preprocessing followed established protocols, including steps such as  
109 realignment, mask creation, coregistration, spatial normalization, signal cleaning, and  
110 spatial smoothing, as detailed in our previous work [11]. For the MDMA dataset, PET  
111 scans were analyzed for early and late effects post-challenge using the general linear  
112 model (GLM) available in SPM. For both datasets the baseline was defined 30 to 40  
113 minutes after scan start. For the fMRI data a first level analysis was applied to the  
114 individual scans without a high-pass filter (the filter was set to “Inf”). Statistical  
115 parametric maps were generated post GLM parameter estimation using contrast  
116 vectors. Group-level analysis involved a one-sample t-test on the subject-level  
117 statistical parametric maps ( $p < 0.05$ , one-sided, family wise error / FWE-adjusted).

118 Static PET scans were generated by summing dynamic frames over defined periods  
119 for 10-minute periods after the MDMA challenge (50-60 minutes to investigate early  
120 effects, and 70-80 minutes to investigate late MDMA effects). Two-sample t-maps  
121 were calculated between the normalized [ $^{11}\text{C}$ ]DASB uptakes of (1) the baseline scan  
122 period and the early effect time period and of (2) the early effect time period and the  
123 late effect time period ( $p < 0.05$ , FWE-adjusted).

124 All group-level t-maps underwent voxel-wise signal quantification to determine the  
125 regional contributions of 48 regions selected according to the Schiffer atlas [14].  
126 Average t-scores and standard deviations of all voxels were calculated.

## 127 **Functional Connectivity Analysis**

128 Functional connectivity was determined using a seed-based analysis approach. The  
129 mean time series of the pre-processed BOLD-fMRI signals for each dataset across  
130 all regions (refer to *Supplementary Table 1* for the list of regions) were extracted  
131 using SPM toolbox Marseille Boîte À Région d’Intérêt (MarsBaR). Pairwise Pearson’s  
132 correlation coefficients were calculated between each pair of mean regional time-  
133 series for every dataset. The Pearson’s  $r$  coefficients were converted into z-values  
134 using Fischer’s transformation for group-level analysis. The Fischer’s z-transformed

135 correlation coefficients were then used to generate mean correlation matrices for  
136 both cohorts [15].

### 137 **Molecular connectivity analysis**

138 The mean [ $^{11}\text{C}$ ]DASB signal from the preprocessed PET datasets was extracted from  
139 the designed regions, including the 48 regions used for fMRI data analysis and the  
140 cerebellum using MarsBaR. Binding potentials were calculated frame-wise for all  
141 dynamic PET scans using the DVR-1 (equation 1) to generate regional  $\text{BP}_{\text{ND}}$  values  
142 using the cerebellum as a reference region [16]:

$$143 \quad \text{BP}_{\text{ND}} = \frac{V_T - V_{\text{ND}}}{V_{\text{ND}}} = \frac{V_T}{V_{\text{ND}}} - 1 = \text{DVR} - 1,$$

144 where:

- 145 •  $\text{BP}_{\text{ND}}$  is the binding potential
- 146 •  $V_T$  is the total volume of distribution
- 147 •  $V_{\text{ND}}$  is the volume of distribution in a reference tissue
- 148 •  $\text{DVR}$  is the relative volume of distribution

149 To calculate MC, we discarded the first 20 minutes of every scan, which were  
150 dominated by perfusion effects and applied a detrending approach on the remaining  
151 60 minutes in order to obtain temporally stable values (for further details, please refer  
152 to Supplementary Methods and Supplementary Figure 1). The  $\text{BP}_{\text{ND}}$  time courses  
153 were then used to calculate MC as described above for fMRI: subject-level  
154 correlation matrices between all regional time courses were generate and z-  
155 transformed correlation coefficients were used to calculate mean correlation  
156 matrices.

### 157 **Independent Component Analysis**

158 Group ICA (GIFT toolbox, MIALAB, University of New Mexico, Albuquerque, NM,  
159 USA) was used for ICA of the baseline group. Both the fMRI and PET preprocessed  
160 data sets were investigated between 30 and 80 minutes after start of data  
161 acquisition. For fMRI, we selected 10 independent components, while we started with  
162 two components for PET and increased the number to ten components to thoroughly  
163 dissect the varying components within the signal. Components were thresholded at a  
164 z-value  $\geq 1.96$  (p-value  $\leq 0.05$ ) [17] and average z-scores and standard deviations

165 were calculated for each component. These components' physiological significance  
166 was further explored by contrasting them with the regional [<sup>11</sup>C]DASB changes  
167 induced by MDMA. Accordingly, the z-scores of the independent components  
168 generated in the baseline cohort were correlated with the early and late regional  
169 [<sup>11</sup>C]DASB changes induced by MDMA, measured using t-scores.

## 170 **Results**

### 171 **Comparability of MC and FC in spatial contexts and over time**

172 We first aimed to evaluate whether MC aligns spatially with FC, possesses similar  
173 graph theory properties and provides consistent temporal readouts throughout the  
174 scan duration in the baseline group (Figure 1).

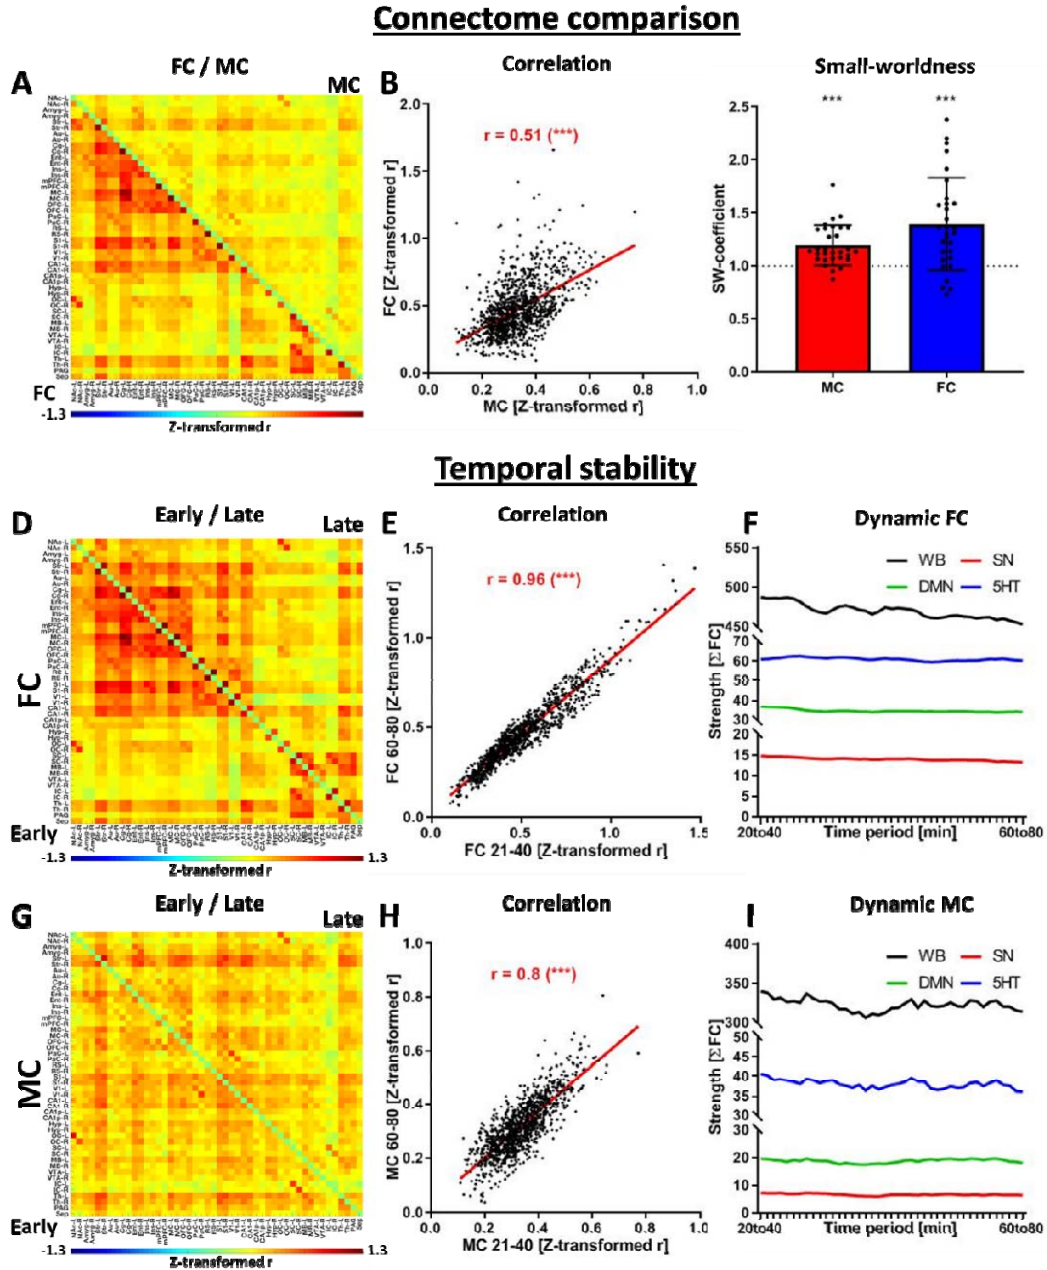

175

176 **Figure 1: Evaluation of seed-based MC.** (A) Correlation matrix indicating whole-brain FC (beneath  
 177 diagonal) and MC (above diagonal). Correlations not surviving significance testing with multiple  
 178 comparison corrections were set to zero ( $p < 0.05$ , FWE correction). (B) Scatter plot and correlation  
 179 between MC and FC edges. (C) Small-world coefficients for all subjects and group-level one-sample t-  
 180 test against the value of 1 ( $SW > 1$  is considered as indicative of small-world properties). Comparison  
 181 of (D) FC and (G) MC early (20-40 minutes after scan start, below diagonal) and late (60-80 minutes  
 182 after scan start, above diagonal). The similarities of early and late readouts were quantified for both (E)  
 183 FC and (H) MC. Temporal stability of both (F) FC and (I) MC was evaluated using a sliding window  
 184 approach including 20-minute windows between FC 20 and 80 minutes after scan start. Abbreviations: FC



185 = fMRI-derived hemodynamic functional connectivity, MC = [<sup>11</sup>C]DASB PET-derived molecular  
186 connectivity.

187 We found moderate, but significant correlation between the edge-level MC and FC (r  
188 = 0.51,  $p < 0.001$ , Figure 1A and B). Furthermore, both connectomes revealed small-  
189 world properties at group-level, with coefficients higher than 1 (Figure 1C). At subject  
190 level, three molecular and four functional connectomes fell below the threshold of 1  
191 for the small-world coefficient. A significant consistency was observed between  
192 early and late scan-derived connectomes (Figure 1D for FC, G for MC), with FC  
193 having a slight edge (Figure 1E,  $r = 0.96$ ) over MC (Figure 1H,  $r = 0.8$ ). While both,  
194 FC and MC maintained steady correlation intensities, there was a negligible decline  
195 over the scan duration (Figure 1F and 1I).

### 196 **Deciphering spatial characteristics of FC and MC using ICA**

197 After establishing the feasibility of obtaining temporally stable readouts using the  
198 ROI-to-ROI approach, we employed a data-driven approach, using ICA, to compare  
199 spatial characteristics of FC and MC (Figure 2).

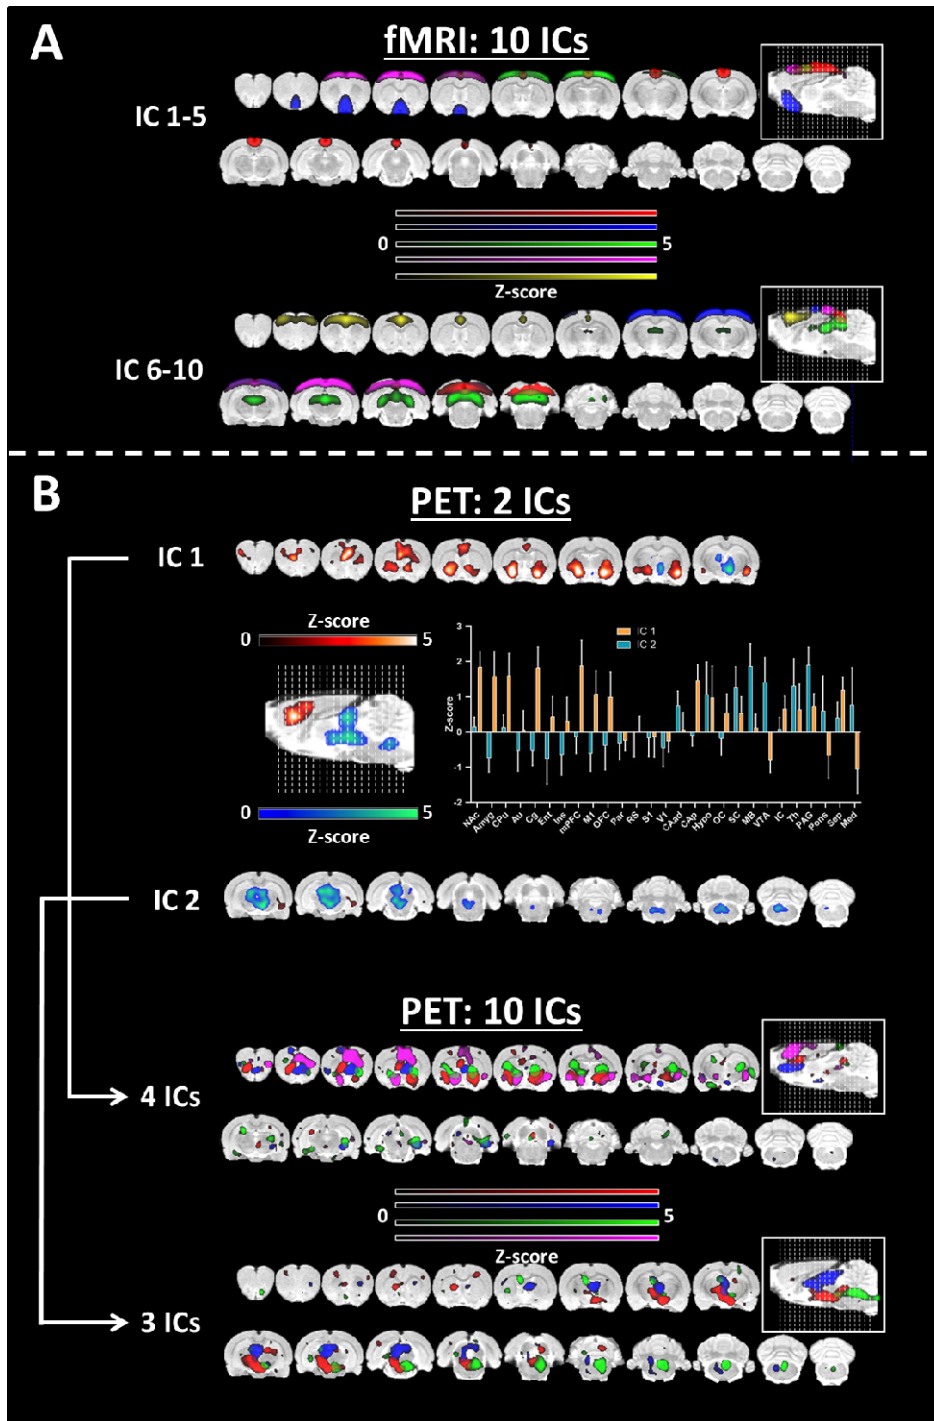

200

201 **Figure 2: Group independent component analysis for FC and MC. (A)** ICA performed over 10  
202 components for fMRI. **(B)** ICA performed over 2 components for [<sup>11</sup>C]DASB PET and regional  
203 quantification of the two derived components. The ICA was repeated over 10 components. Four and  
204 three components showed good overlap with the two components defined above. All components  
205 were thresholded at  $z > 1.96$  ( $p \leq 0.05$ ). Abbreviations: FC = fMRI-derived hemodynamic functional  
206 connectivity, MC = [<sup>11</sup>C]DASB PET-derived molecular connectivity.

207 We extracted ten group ICs from the fMRI data (Figure 2A), revealing known  
208 canonical resting-state networks, such as the posterior default-mode-like network  
209 (IC1-5, red), sensorimotor networks (IC1-5, green and purple), the anterior default-  
210 mode-like network (IC6-10, yellow) or the visual network (IC6-10, red). With  
211 unpredictability for the number of ICs suitable for MC IC extraction, we started with  
212 two components (Figure 2B). IC1 (orange) comprised both subcortical and cortical  
213 anterior brain regions, including the nucleus accumbens, amygdala, cingulate cortex,  
214 caudate putamen, orbitofrontal cortex and medial prefrontal cortex, while IC2 (blue)  
215 primarily received contributions from deeper posterior areas, such as the midbrain,  
216 thalamus, hypothalamus, periaquaeductal gray and medulla. Interestingly, when we  
217 extracted 10 independent components, to mimic the number of components used for  
218 the FC data, we found that the initial anterior component split in four different ICs and  
219 the initial posterior IC in three different ICs. A relatively clear spatial segregation can  
220 be seen for the newly-formed ICs, for instance the three posterior components being  
221 extracted from specific regions (green mainly from medulla, red from hypothalamus  
222 and part of the midbrain, blue from midbrain and thalamus).

### 223 **MDMA-induced changes of ICA-derived molecular connectivity**

224 Next, we aimed to explore the relationship between molecular changes in SERT  
225 availability and the molecular connectome derived from ICA, induced by an acute  
226 MDMA administration (Figure 3).

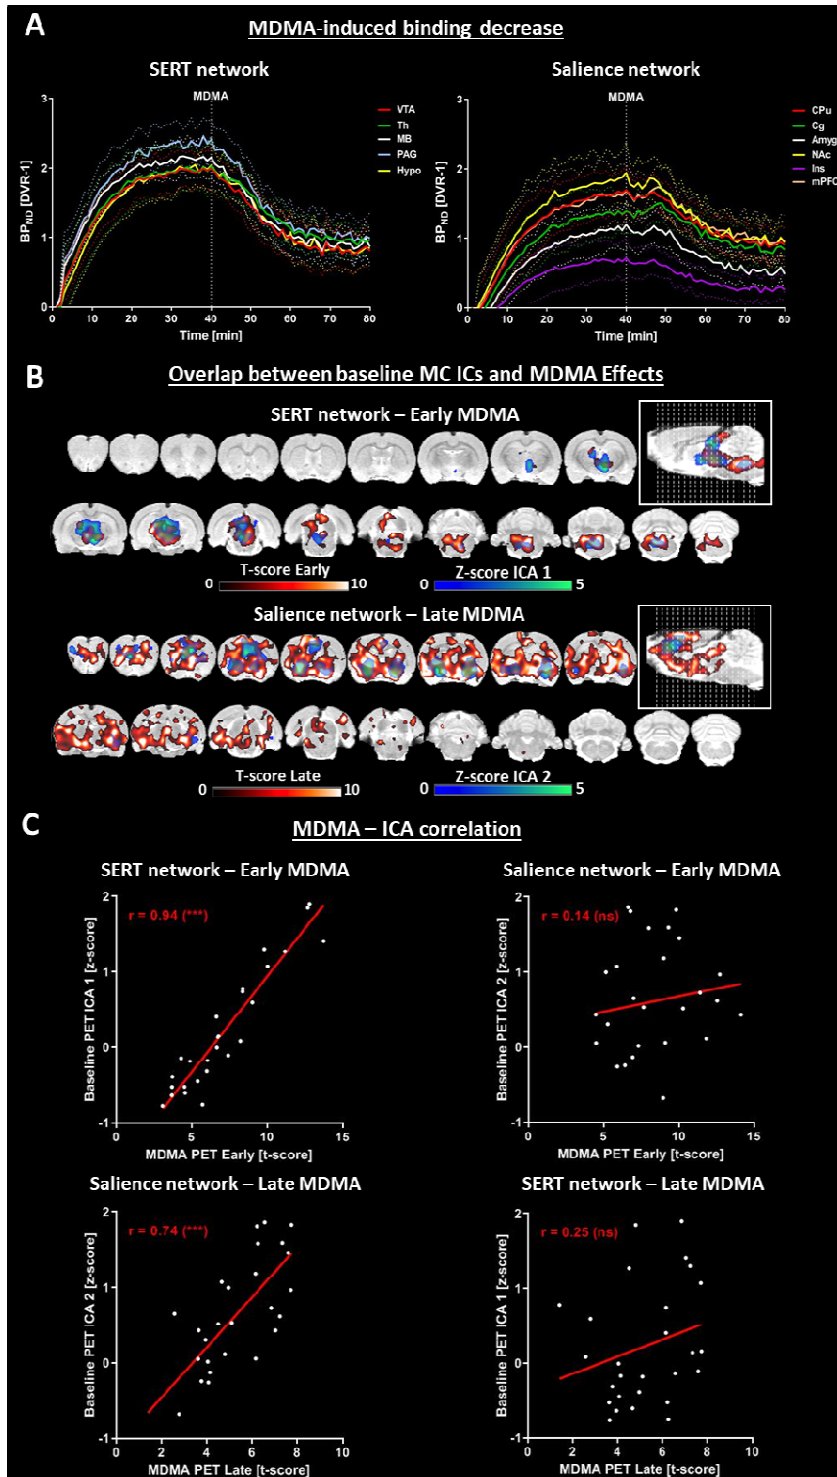

227

228 **Figure 3: Comparison of MDMA-induced [<sup>11</sup>C]DASB alterations.** (A) Left panel: Dynamic binding  
229 potentials of regions comprising SERT network, defined by IC 1 in validation cohort. Right panel:  
230 Dynamic binding potentials of regions comprising salience network, defined by IC 1 in validation  
231 cohort. (B) Overlap between independent components extracted from the validation cohort (IC 1 =  
232 SERT network; IC 2 = salience network) and the early and late effects of MDMA respectively. (C) Pair-

233 wise correlations between regional z-scores of the ICs extracted from validation cohort and regional t-  
234 scores of early and late MDMA effects. (\*\*\*) indicates  $p < 0.001$ , ns = non-significant). Abbreviations:  
235 SERT = serotonin transporter, ICA = independent component analysis; for abbreviations of regions  
236 please refer to *Supplementary Information*).

237 Two IC extracted from the MC showed good overlap with regions associated with the  
238 salience network (IC1) and with those having high SERT densities (IC2). Therefore,  
239 we defined the regions contributing strongly to IC1 as salience network (CPu, Cg,  
240 NAc, Amyg, Ins, mPFC) and those with strong signals in IC2 as SERT network (VTA,  
241 Th, MB, PAG, Hypo). Interestingly, MDMA induced immediate strong decreases in all  
242 SERT network regions, salience areas exhibited a delay by approximately 10 minutes  
243 (Figure 3A). Voxel-level analysis showed clear spatial overlaps between early MDMA  
244 responsive regions and those from the posterior IC, with delayed regions mirroring  
245 the anterior IC reminiscent of the salience network (Figure 3B). To quantify the  
246 striking spatial similarity between the baseline independent components and the  
247 spatiotemporal characteristics of [ $^{11}\text{C}$ ]DASB changes after MDMA exposure, we  
248 show highly significant correlations between the z-scores of the posterior and anterior  
249 ICs and the t-scores of late and early MDMA effects on [ $^{11}\text{C}$ ]DASB alterations,  
250 respectively ( $p < 0.0001$ , Figure 3C).

251 Finally, we investigated relationships between SERT availability changes and MC  
252 reductions following the acute MDMA challenge (Figure 4).

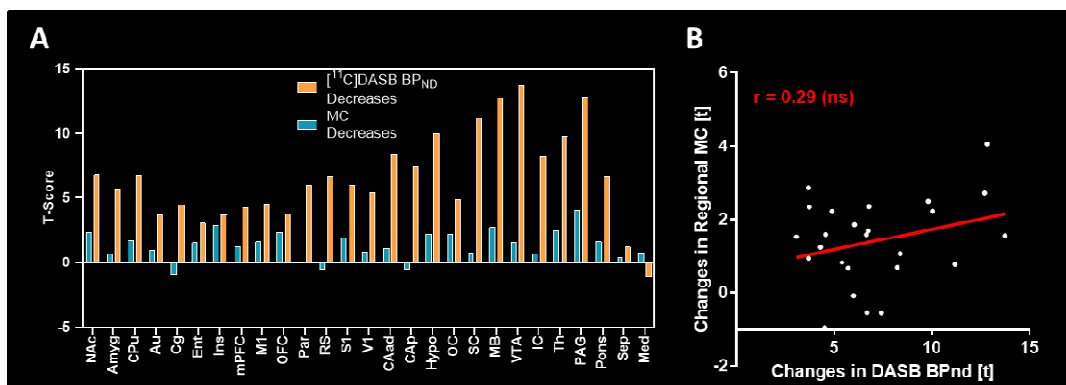

253

254 **Figure 4: Comparison of MC and  $\text{BP}_{\text{ND}}$  changes.** A Reduction in  $\text{BP}_{\text{ND}}$  following MDMA (orange)  
255 and MC strength (blue) was compared. B T-scores derived from each approach show only low  
256 correlations.

257 We found that the decreases in MC and in [ $^{11}\text{C}$ ]DASB  $\text{BP}_{\text{ND}}$  following MDMA  
258 application (Figure 4A) showed only low correlation ( $r = 0.29$ , Figure 4B). While

259 decreases in SERT availability exhibited a strong anterior-posterior gradient, being  
260 most pronounced in areas with high SERT availability, such as the MB, VTA, Pons or  
261 PAG, MC encompassed regions across the brain to similar extents. Specifically,  
262 while the significance of [ $^{11}\text{C}$ ]DASB reductions in the Ins was very low across  
263 investigated regions, the Ins showed highest effects among regions for MC, while  
264 strong SERT occupancy effects in the IC and SC did not translate in very prominent  
265 reductions in the respective global MC of the two regions.

## 266 MDMA-induced changes of seed based molecular connectivity

267 Next, we performed a seed-based analysis and aimed to compare changes in FC  
268 and MC after an MDMA pharmacological challenge on the salience network and on  
269 regions with high SERT binding (Figure 5).

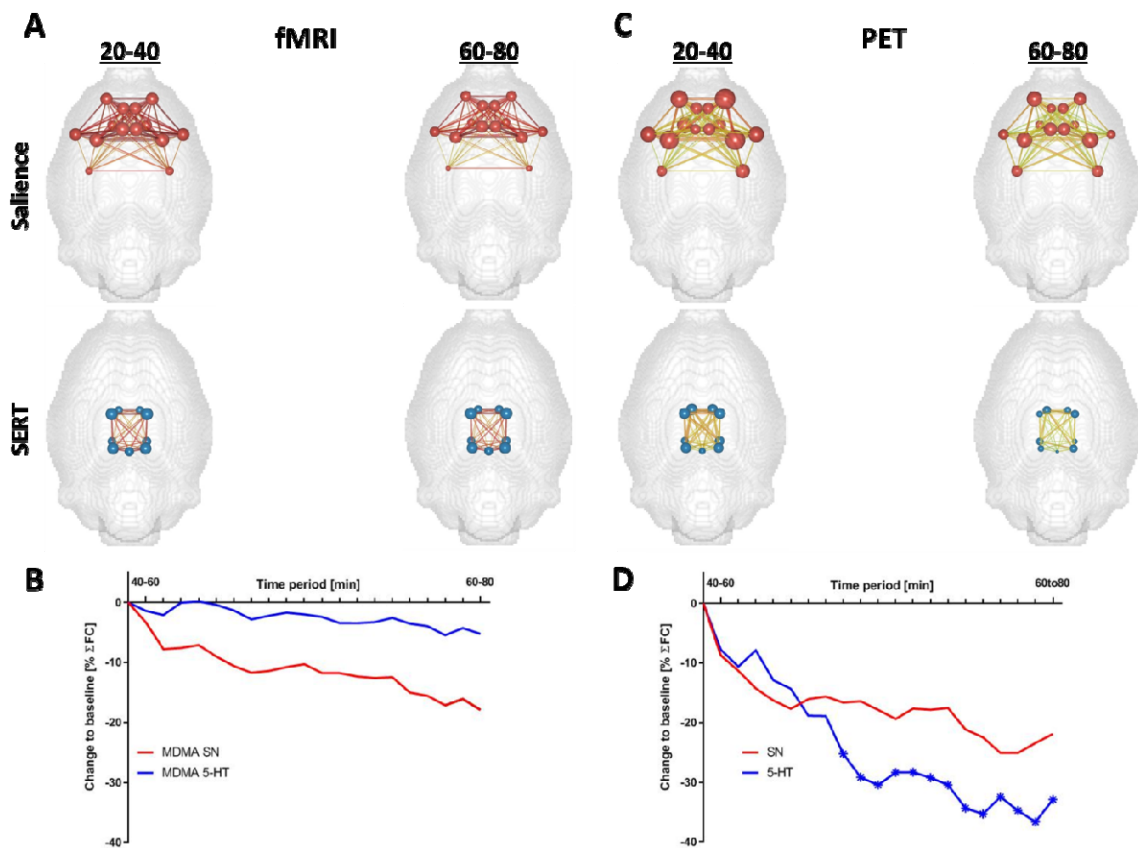

270

271 **Figure 5: MDMA effects on seed-based FC and MC of the salience and SERT networks. (A)** FC  
272 and **(C)** MC brain networks depicting edge and node strengths of the salience network and SERT  
273 network at baseline (20-40 min after scan start) and after MDMA (60-80 min after scan start). **(B)** FC  
274 and **(D)** MC time-resolved salience and SERT network strengths computed using sliding windows.  
275 Asterisks indicate significant ( $p < 0.05$ , FDR-corrected) changes to baseline (time-point zero,

276 corresponding to 20-40 minutes after scan start). Abbreviations: SN = salience network, SERT =  
277 SERT network.

278 We observed a small decrease in the SN for FC (16% at the end of the scan) and  
279 almost constant FC of the SERT network (<5% decrease) following MDMA, as shown  
280 in Figure 5A at edge and node level and Figure 5C at network level ( $p>0.05$ ). For  
281 MC, we observed profound reductions in the SERT network (Figure 5C and D),  
282 emphasizing an acute and spatially specific effect of MDMA on MC.

## 283 **Discussion**

284 The mammalian brain operates on diverse physiological, spatial and temporal scales.  
285 FC via BOLD-fMRI offers insights into coherent functional brain networks, but its  
286 complexity and indirect link to neural activity highlight the need for more direct  
287 methodologies. In this context, the concept of MC using [ $^{11}\text{C}$ ]DASB PET, as  
288 introduced in our study, provides a more direct and complementary perspective on  
289 brain organization and its response to external stimuli, such as MDMA.

## 290 **Physiological basis**

291 Our findings suggest that [ $^{11}\text{C}$ ]DASB binding reflect the interplay of serotonin levels  
292 and SERT dynamics [18]. Supporting the competition model, evidence indicates that  
293 endogenous serotonin competes with tracers for binding sites, affecting tracer  
294 binding [19]. However, contrasting results in various studies highlight the complexity  
295 of this interaction [20] [21] [22]. The internalization model suggests serotonin levels  
296 influence SERT internalization, impacting [ $^{11}\text{C}$ ]DASB binding [18, 23, 24]. While  
297 supporting evidence exists, further exploration is needed to fully understand these  
298 dynamics, especially during resting states [25]. Some models on this aspect have  
299 proposed a regulatory function of the raphé nuclei in maintaining serotonin  
300 fluctuations over several temporal scales at rest [26]. Remarkably, fast microdialysis  
301 has resolved multiple spontaneous surges of up to 1500-fold of the basal serotonin  
302 occurring during 30-minute intervals [27]. Additionally, the same study has indicated  
303 that SERT expression is essential for the spontaneous surges, reduced SERT  
304 drastically decreasing serotonin spiking. Thus, it is feasible that the correlated  
305 temporal fluctuations captured by dynamic [ $^{11}\text{C}$ ]DASB at least partly reflect the role of  
306 the serotonergic system in brain resting activity.

## 307 **Implications for whole-brain serotonergic system**

308 Our graph-theory analysis revealed comparable whole-brain organization between  
309 hemodynamic and serotonergic connectomes, although we only found moderate  
310 correlation between the edges of the two measurements. Notably, the correlations in  
311 [<sup>11</sup>C]DASB bindings differed from BOLD-fMRI-derived correlations. For BOLD-fMRI,  
312 ICA revealed classic RSNs, widely reported for both rats [28] and humans [29],  
313 including the default-mode network, the sensory network and the motor network. In  
314 contrast, the ICA analysis of PET data revealed two distinct anatomical modules. The  
315 first component included primarily the brainstem, parts of the midbrain and the  
316 thalamus. The second component comprised regions of the limbic system, such as  
317 the striatum, amygdala, insular, cingulate and prefrontal cortices, reflecting the  
318 diverse projections of the raphe nuclei. The distinct anatomical modules identified in  
319 the ICA analysis of PET data reflect the diverse projections of raphe nuclei,  
320 suggesting a complex serotonergic system response to drugs. MDMA's interaction  
321 with SERT, as elucidated by [<sup>11</sup>C]DASB, shows region-specific temporal effects, with  
322 immediate decreases in binding in the brainstem and posterior subcortical regions,  
323 and delayed effects in limbic pathways. This suggests that the serotonergic system's  
324 response to drugs can be predicted, to an extent, by the observed independent  
325 components.

## 326 **Relevance to prior research**

327 Our findings align with those by Salvan et al [31] on the integration of molecular maps  
328 into fMRI data demonstrating how individual serotonergic receptors contribute to  
329 network-level activity. Despite our differing methodologies, the receptor activity  
330 patterns they found, may also correspond to the different independent components  
331 we found from the [<sup>11</sup>C]DASB PET data. The dual regression approach reported by  
332 Salvan et al. has first been reported in the context of pharmacology to delineate the  
333 receptor-specific effects of MDMA in humans [32]. The authors found that MDMA  
334 specifically decreased FC in the 5HT1A maps in areas which could be ascribed to the  
335 human salience network, such as the insula and a collection of medial cortical  
336 regions. While not reaching significance, we observed in reduced salience FC and  
337 MC in our data.



338 Previous studies evaluating the effects of MDMA on FC indicated relatively sparse  
339 effects on FC, as confirmed by the readout of this study [33, 34]. Recently, a novel  
340 approach [32] has revealed decreased connectivity induced by MDMA in areas  
341 associated with SERT and 5-HT<sub>1A</sub> availability. The increased activity indicated in  
342 limbic and cortical structures when controlling for vascular effects is accompanied  
343 with decreased salience connectivity, indicating that, while neurons become more  
344 active through the drug, they do so in an incoherent manner, which would be in line  
345 with the hyperactive, yet abnormal behavior reported for MDMA abuse. Importantly,  
346 the potent vascular effects which play a role in modulating the amplitude of the  
347 BOLD-fMRI signal may also influence FC readouts, although the extent of such  
348 effects are difficult to estimate.[11]

349 Over the past decade, PET studies using [<sup>11</sup>C]DASB have focused on the  
350 associations of serotonin transporter (SERT) availabilities across different brain  
351 regions, revealing altered interregional SERT connections in patient cohorts, post-  
352 treatment changes, and predictive capacity for treatment response [9, 10, 35] [36]  
353 [37]. Our study builds upon this foundation, uncovering significant within-subject  
354 temporal associations in [<sup>11</sup>C]DASB binding, and demonstrates more pronounced  
355 alterations in MC compared FC changes induced by drugs, thus highlighting the  
356 enhanced utility of our method.

### 357 **Study limitations and future directions**

358 While our study advances the understanding of MC, the use of anesthetized animal is  
359 a limitation, potentially affecting PET and fMRI readouts and their interaction with  
360 MDMA. Future studies should involve awake animals to validate our method.  
361 Additionally, our multimodal imaging approach, though powerful, cannot fully  
362 decipher the mechanisms of interregional coherences in PET timecourses. Future  
363 studies employing sensitive methods to measure neurotransmitter release, could  
364 provide deeper insights into the molecular processes underpinning our observations.

365 Nonetheless, we provide several strong arguments to consider such analyses as  
366 presented here in future studies. First, we show that at rest the data are reliable,  
367 temporally stable and exhibiting similar graph theory metrics to traditionally calculated  
368 functional connectomes. Second, in spite of comparable network-level organizational  
369 properties, already at rest MC is only moderately correlated to FC, indicating the

370 complementary nature of both readouts. Third, resting-state MC ICs correlate well  
371 with SERT occupancy changes induced by the MDMA challenge. Finally, we show  
372 that the changes MDMA elicits on MC are complementary to standardly-calculated  
373 [<sup>11</sup>C]DASB BP<sub>ND</sub> alterations. Our data indicate that, while changes in BP<sub>ND</sub> are more  
374 pronounced in regions with higher baseline SERT availabilities, MC reveals a more  
375 globally distributed measure of tracking serotonergic changes, since also regions,  
376 such as the insula, with relatively low SERT expressions, were strongly affected.

## 377 **Conclusion**

378 This study significantly contributes to integrating molecular data into connectomic  
379 frameworks, demonstrating that subject-level MC is reliable and complementary to  
380 FC in both resting and pharmacologically challenged states. Our research lays a  
381 strong foundation for future investigations into the value and generalizability of PET-  
382 derived MC, particularly for understanding drug-induced brain-wide molecular  
383 network changes.

## 384 **Bibliography**

- 385 1. Wehrl, H.F., et al., *Simultaneous PET-MRI reveals brain function in activated*  
386 *and resting state on metabolic, hemodynamic and multiple temporal scales.*  
387 *Nat Med*, 2013. **19**(9): p. 1184-9.
- 388 2. Judenhofer, M.S., et al., *Simultaneous PET-MRI: a new approach for*  
389 *functional and morphological imaging.* *Nat Med*, 2008. **14**(4): p. 459-65.
- 390 3. Biswal, B., et al., *Functional connectivity in the motor cortex of resting human*  
391 *brain using echo-planar MRI.* *Magn Reson Med*, 1995. **34**(4): p. 537-41.
- 392 4. Jonckers, E., et al., *The power of using functional fMRI on small rodents to*  
393 *study brain pharmacology and disease.* *Frontiers in Pharmacology*, 2015.  
394 **6**(231).
- 395 5. Sander, C.Y., et al., *Neurovascular coupling to D2/D3 dopamine receptor*  
396 *occupancy using simultaneous PET/functional MRI.* *Proceedings of the*  
397 *National Academy of Sciences of the United States of America*, 2013. **110**(27):  
398 p. 11169-11174.
- 399 6. Buxton, R.B., *Dynamic models of BOLD contrast.* *NeuroImage*, 2012. **62**(2): p.  
400 953-961.
- 401 7. Silberbauer, L.R., et al., *Serotonin Transporter Binding in the Human Brain*  
402 *After Pharmacological Challenge Measured Using PET and PET/MR.*  
403 *Frontiers in Molecular Neuroscience*, 2019. **12**(172).
- 404 8. Amend, M., et al., *Functional resting-state brain connectivity is accompanied*  
405 *by dynamic correlations of application-dependent [(18)F]FDG PET-tracer*  
406 *fluctuations.* *Neuroimage*, 2019. **196**: p. 161-172.

- 407 9. Lanzenberger, R., et al., *Prediction of SSRI treatment response in major*  
408 *depression based on serotonin transporter interplay between median raphe*  
409 *nucleus and projection areas*. *Neuroimage*, 2012. **63**(2): p. 874-81.
- 410 10. Vanicek, T., et al., *Altered interregional molecular associations of the serotonin*  
411 *transporter in attention deficit/hyperactivity disorder assessed with PET*.  
412 *Human Brain Mapping*, 2017. **38**(2): p. 792-802.
- 413 11. Ionescu, T.M., et al., *Neurovascular Uncoupling: Multimodal Imaging*  
414 *Delineates the Acute Effects of 3,4-Methylenedioxymethamphetamine*. *J Nucl*  
415 *Med*, 2023. **64**(3): p. 466-471.
- 416 12. Ionescu, T.M., et al., *Striatal and prefrontal D2R and SERT distributions*  
417 *contrastingly correlate with default-mode connectivity*. *Neuroimage*, 2021. **243**:  
418 p. 118501.
- 419 13. Disselhorst, J.A., et al., *NEMA NU 4-2008 performance evaluation and MR*  
420 *compatibility tests of an APD-based small animal PET-insert for simultaneous*  
421 *PET/MR imaging*. *Phys Med Biol*, 2022. **67**(4).
- 422 14. Schiffer, W.K., et al., *Serial microPET measures of the metabolic reaction to a*  
423 *microdialysis probe implant*. *J Neurosci Methods*, 2006. **155**(2): p. 272-84.
- 424 15. Xia, M., J. Wang, and Y. He, *BrainNet Viewer: A Network Visualization Tool*  
425 *for Human Brain Connectomics*. *PLOS ONE*, 2013. **8**(7): p. e68910.
- 426 16. Walker, M., et al., *In Vivo Evaluation of 11C-DASB for Quantitative SERT*  
427 *Imaging in Rats and Mice*. *J Nucl Med*, 2016. **57**(1): p. 115-21.
- 428 17. Di, X., B.B. Biswal, and I. Alzheimer's Disease Neuroimaging, *Metabolic brain*  
429 *covariant networks as revealed by FDG-PET with reference to resting-state*  
430 *fMRI networks*. *Brain Connect*, 2012. **2**(5): p. 275-83.
- 431 18. Paterson, L.M., et al., *Measuring Endogenous 5-HT Release by Emission*  
432 *Tomography: Promises and Pitfalls*. *Journal of Cerebral Blood Flow &*  
433 *Metabolism*, 2010. **30**(10): p. 1682-1706.
- 434 19. Yamamoto, S., et al., *Effects of increased endogenous serotonin on the in vivo*  
435 *binding of [11C]DASB to serotonin transporters in conscious monkey brain*.  
436 *Synapse*, 2007. **61**(9): p. 724-731.
- 437 20. Lundquist, P., et al., *Effect on [11C]DASB binding after tranylcypromine-*  
438 *induced increase in serotonin concentration: Positron emission tomography*  
439 *studies in monkeys and rats*. *Synapse*, 2007. **61**(6): p. 440-449.
- 440 21. Talbot, P.S., et al., *Effects of reduced endogenous 5-HT on the in vivo binding*  
441 *of the serotonin transporter radioligand 11C-DASB in healthy humans*.  
442 *Synapse*, 2005. **55**(3): p. 164-175.
- 443 22. Lefevre, A., et al., *Oxytocin and Serotonin Brain Mechanisms in the*  
444 *Nonhuman Primate*. *The Journal of Neuroscience*, 2017. **37**(28): p. 6741-  
445 6750.
- 446 23. Ramamoorthy, S. and R.D. Blakely, *Phosphorylation and Sequestration of*  
447 *Serotonin Transporters Differentially Modulated by Psychostimulants*. *Science*,  
448 1999. **285**(5428): p. 763-766.
- 449 24. Blakely, R.D., et al., *Regulated phosphorylation and trafficking of*  
450 *antidepressant-sensitive serotonin transporter proteins*. *Biological Psychiatry*,  
451 1998. **44**(3): p. 169-178.
- 452 25. Raichle, M.E. and D.A. Gusnard, *Appraising the brain's energy budget*.  
453 *Proceedings of the National Academy of Sciences*, 2002. **99**(16): p. 10237-  
454 10239.
- 455 26. Salomon, R.M. and R.L. Cowan, *Oscillatory serotonin function in depression*.  
456 *Synapse*, 2013. **67**(11): p. 801-820.

- 457 27. Yang, H., et al., *Physiologically relevant changes in serotonin resolved by fast*  
458 *microdialysis*. ACS chemical neuroscience, 2013. **4**(5): p. 790-798.
- 459 28. Becerra, L., et al., *Robust reproducible resting state networks in the awake*  
460 *rodent brain*. PLoS One, 2011. **6**(10): p. e25701.
- 461 29. Fox, M.D., et al., *The human brain is intrinsically organized into dynamic,*  
462 *anticorrelated functional networks*. Proc Natl Acad Sci U S A, 2005. **102**(27):  
463 p. 9673-8.
- 464 30. Shih, J.-H., et al., *Evaluation of brain SERT occupancy by resveratrol against*  
465 *MDMA-induced neurobiological and behavioral changes in rats: A 4-[18F]-*  
466 *ADAM/small-animal PET study*. European Neuropsychopharmacology, 2016.  
467 **26**(1): p. 92-104.
- 468 31. Salvan, P., et al., *Serotonin regulation of behavior via large-scale*  
469 *neuromodulation of serotonin receptor networks*. Nat Neurosci, 2023. **26**(1): p.  
470 53-63.
- 471 32. Dipasquale, O., et al., *Receptor-Enriched Analysis of functional connectivity by*  
472 *targets (REACT): A novel, multimodal analytical approach informed by PET to*  
473 *study the pharmacodynamic response of the brain under MDMA*. NeuroImage,  
474 2019. **195**: p. 252-260.
- 475 33. Carhart-Harris, R.L., et al., *The Effects of Acutely Administered 3,4-*  
476 *Methylenedioxymethamphetamine on Spontaneous Brain Function in Healthy*  
477 *Volunteers Measured with Arterial Spin Labeling and Blood Oxygen Level-*  
478 *Dependent Resting State Functional Connectivity*. Biological Psychiatry, 2015.  
479 **78**(8): p. 554-562.
- 480 34. Roseman, L., et al., *The effects of psilocybin and MDMA on between-network*  
481 *resting state functional connectivity in healthy volunteers*. Frontiers in human  
482 neuroscience, 2014. **8**: p. 204-204.
- 483 35. James, G.M., et al., *Effects of Selective Serotonin Reuptake Inhibitors on*  
484 *Interregional Relation of Serotonin Transporter Availability in Major*  
485 *Depression*. Frontiers in Human Neuroscience, 2017. **11**(48).
- 486 36. Hahn, A., et al., *Attenuated serotonin transporter association between dorsal*  
487 *raphe and ventral striatum in major depression*. Human brain mapping, 2014.  
488 **35**(8): p. 3857-3866.
- 489 37. Hahn, A., et al., *Escitalopram enhances the association of serotonin-1A*  
490 *autoreceptors to heteroreceptors in anxiety disorders*. J Neurosci, 2010.  
491 **30**(43): p. 14482-9.

492
